# Supplementary material for: Photo-assisted high performance single atom electrocatalysis of the N2 reduction reaction by a Mo-embedded covalent organic framework
Source: Royal Society of Chemistry journal article supplement (doi:10.1039/d1ta02691g), 2021-01-01
Supplement: d1ta02691g1.pdf [file d1ta02691g1.pdf]

## Supplementary Information

# Photo-Assisted High Performance Single Atom Electrocatalysis of N<sub>2</sub> Reduction Reaction by Mo- embedded Covalent Organic Framework

Juan Wang<sup>1</sup>, Zhihua Zhang<sup>1</sup>, Siyun Qi<sup>1</sup>, Yingcai Fan<sup>1</sup>, Yanmei Yang<sup>2</sup>, Weifeng Li<sup>1\*</sup>,  
Mingwen Zhao<sup>1\*</sup>

1. *School of Physics & State Key Laboratory of Crystal Materials, Shandong University, Jinan 250100, Shandong, China*
2. *College of Chemistry, Chemical Engineering and Materials Science, Collaborative Innovation Center of Functionalized Probes for Chemical Imaging in Universities of Shandong, Key Laboratory of Molecular and Nano Probes, Ministry of Education, Shandong Normal University, Jinan, 250014, China*

\* Corresponding author. E-mail: [lwf@sdu.edu.cn](mailto:lwf@sdu.edu.cn) (W. Li) and [zmw@sdu.edu.cn](mailto:zmw@sdu.edu.cn) (M. Zhao)

**Table S1.** The total energy, the zero-point energy (ZPE), entropy, and free energy of gaseous N<sub>2</sub>, H<sub>2</sub> and NH<sub>3</sub>.

| Species         | Energy (eV) | ZPE (eV) | T*S (eV) | Free Energy (eV) |
|-----------------|-------------|----------|----------|------------------|
| N <sub>2</sub>  | -16.63      | 0.15     | 0.62     | -17.07           |
| H <sub>2</sub>  | -6.78       | 0.27     | 0.40     | -6.90            |
| NH <sub>3</sub> | -19.54      | 0.91     | 0.59     | -19.22           |

**Table S2.** Thermal Corrections of zero-point energy (E<sub>ZPE</sub>), enthalpy correction ( $\int C_p dT$ ), and entropy correction (TS) of different adsorbed species. The entropy correction of the gas-phase molecules was obtained from the NIST database<sup>a</sup>

| Species                           | E <sub>ZPE</sub> | $\int C_p dT$ | T*S  |
|-----------------------------------|------------------|---------------|------|
| H <sub>2</sub> <sup>a</sup>       | 0.27             | 0.09          | 0.40 |
| N <sub>2</sub> <sup>a</sup>       | 0.15             | 0.09          | 0.59 |
| NH <sub>3</sub> <sup>a</sup>      | 0.89             | 0.11          | 0.60 |
| *NN                               | 0.21             | 0.07          | 0.16 |
| *NNH                              | 0.48             | 0.08          | 0.17 |
| *NNHH                             | 0.80             | 0.08          | 0.17 |
| *N                                | 0.09             | 0.03          | 0.06 |
| *NH                               | 0.35             | 0.05          | 0.09 |
| *NH <sub>2</sub>                  | 0.68             | 0.06          | 0.10 |
| *NH <sub>3</sub>                  | 1.03             | 0.06          | 0.10 |
| *NHNH                             | 0.82             | 0.07          | 0.13 |
| *NHNH <sub>2</sub>                | 1.14             | 0.10          | 0.21 |
| *NH <sub>2</sub> NH <sub>2</sub>  | 1.36             | 0.10          | 0.09 |
| *N*N                              | 0.20             | 0.06          | 0.11 |
| *N*NH                             | 0.49             | 0.07          | 0.12 |
| *NH*NH                            | 0.78             | 0.09          | 0.17 |
| *N*NH <sub>2</sub>                | 0.85             | 0.07          | 0.14 |
| *NH*NH <sub>2</sub>               | 1.13             | 0.10          | 0.21 |
| *NH <sub>2</sub> *NH <sub>2</sub> | 1.36             | 0.10          | 0.16 |

$$\Delta G = \Delta E + \Delta E_{ZPE} + \int C_p dT - T\Delta S - \Delta G_U + \Delta G_{pH}$$

a. Computational Chemistry Comparison and Benchmark Database.  
<http://cccbdb.nist.gov/>.

**Table S3.** The Bader charge variation of three moieties along the distal pathway.

| Distal pathway                                         | NmHn<br>(moiety 1) | MoN <sub>4</sub><br>(moiety 2) | Pc-TFPN<br>(moiety 3) |
|--------------------------------------------------------|--------------------|--------------------------------|-----------------------|
| *+N <sub>2</sub> —*NN                                  | 0.28               | -0.19                          | -0.09                 |
| *+N <sub>2</sub> +H—*NNH                               | 0.43               | -0.18                          | -0.25                 |
| *+N <sub>2</sub> +2H—*NNHH                             | 0.37               | -0.14                          | -0.23                 |
| *+N <sub>2</sub> +3H—*N+NH <sub>3</sub>                | 0.74               | -0.20                          | -0.54                 |
| *+N <sub>2</sub> +4H—*NH+NH <sub>3</sub>               | 0.53               | -0.33                          | -0.20                 |
| *+N <sub>2</sub> +5H—*NH <sub>2</sub> +NH <sub>3</sub> | 0.24               | -0.29                          | 0.06                  |
| *+N <sub>2</sub> +6H—*NH <sub>3</sub> +NH <sub>3</sub> | -0.21              | -0.16                          | 0.36                  |

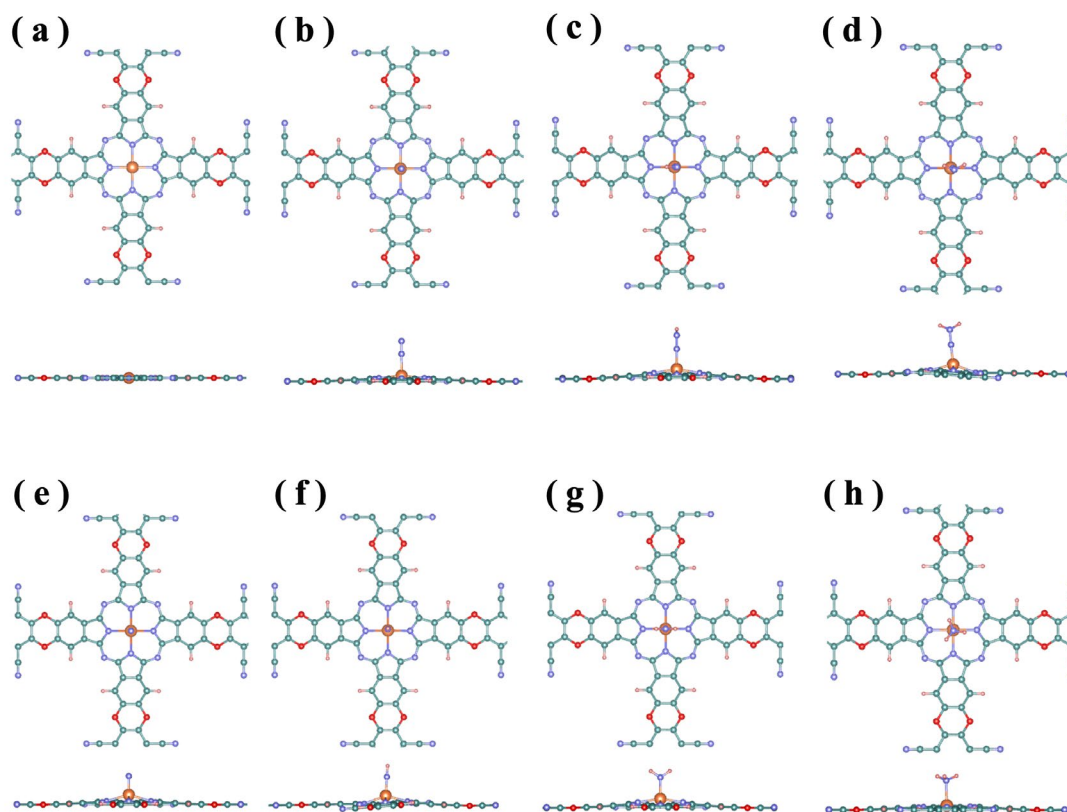

**Figure S1.** The optimized structures of intermediates along the distal pathway.

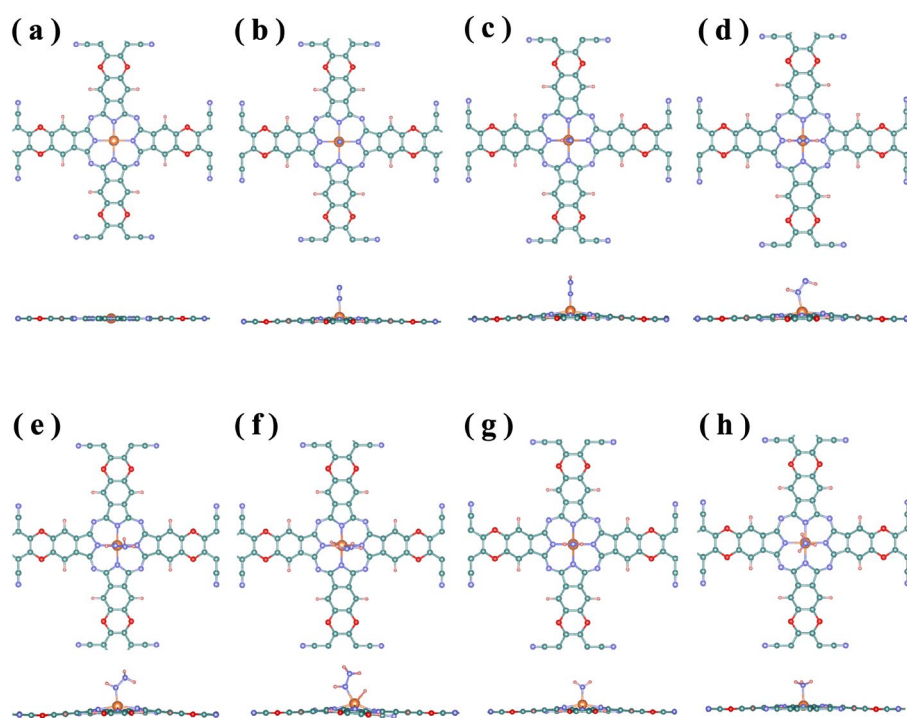

**Figure S2.** The optimized structures of intermediates along the alternating pathway.

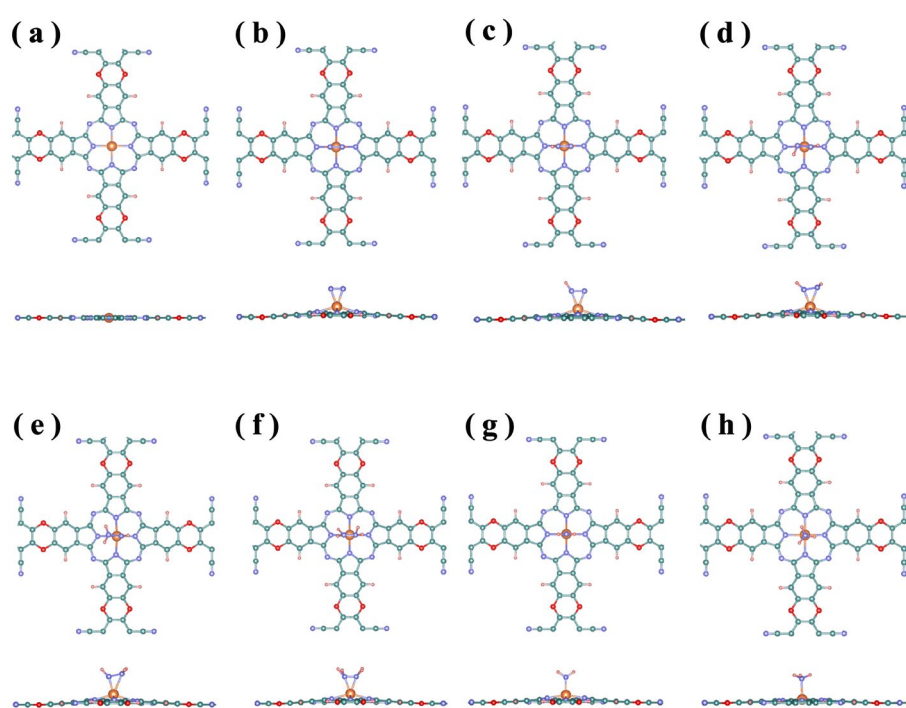

**Figure S3.** The optimized structures of intermediates along the enzymatic pathway.

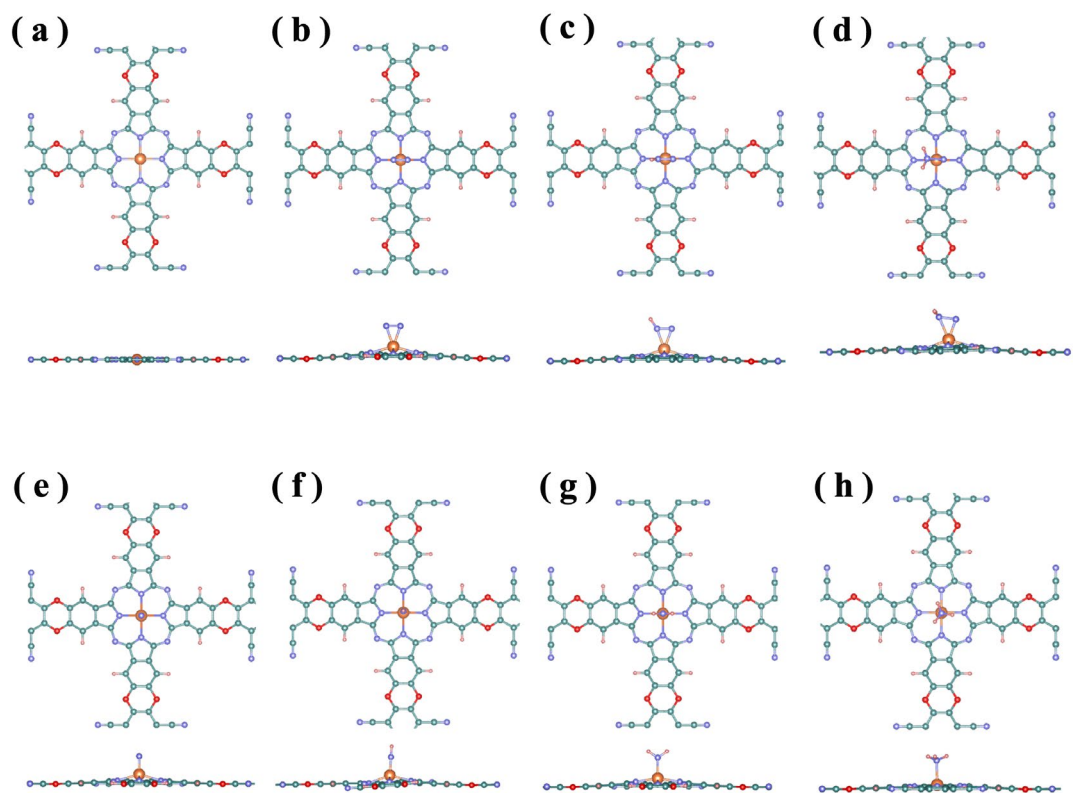

**Figure S4.** The optimized structures of intermediates along the consecutive pathway.

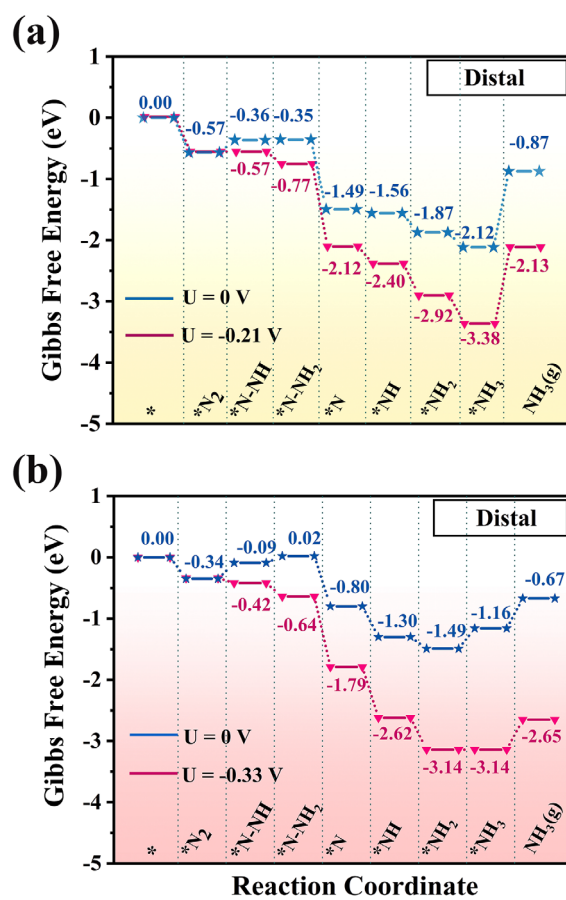

**Figure S5.** Gibbs free energy diagrams for NRR on MoPc-TFPN through distal way with (a) and without (b) correction (enthalpy correction + solvation model) calculations, respectively.
